# Supplementary material for: A common MYBPC3 (cardiac myosin binding protein C) variant associated with cardiomyopathies in South Asia
Source: Springer Nature journal article supplement (doi:10.1038/ng.309), 2009-01-18
Supplement: ng.309-S1.pdf [file ng.309-S1.pdf]

Browse Articles
| Nature Genetics


Skip to main content

Thank you for visiting nature.com. You are using a browser version with limited support for CSS. To obtain
the best experience, we recommend you use a more up to date browser (or turn off compatibility mode in
Internet Explorer). In the meantime, to ensure continued support, we are displaying the site without styles
and JavaScript.

Advertisement


- View all journals
- Search
- Log in

- Explore content
- About the journal
- Publish with us

- Sign up for alerts
- RSS feed


1. nature
2. nature genetics
3. browse articles

# Browse Articles

## Filter By:

Article Type

All

- All
- Analysis (145)
- Article (2582)
- Author Correction (108)
- Book Review (109)
- Brief Communication (446)
- Commentary (65)
- Correction (81)
- Correspondence (630)
- Corrigendum (180)
- Editorial (387)
- Erratum (132)
- Letter (2860)
- News & Views (1529)
- Perspective (93)
- Poster Abstracts (390)
- Publisher Correction (55)
- Research Briefing (76)
- Research Highlight (97)
- Research Highlights (278)
- Technical Report (149)

Year

All

- All
- 2024 (98)
- 2023 (366)
- 2022 (281)
- 2021 (232)
- 2020 (195)
- 2019 (238)
- 2018 (289)
- 2017 (274)
- 2016 (283)
- 2015 (296)
- 2014 (316)
- 2013 (354)
- 2012 (354)
- 2011 (316)
- 2010 (279)
- 2009 (289)
- 2008 (344)
- 2007 (361)
- 2006 (348)
- 2005 (354)

- ### Multi-ancestry genome-wide association study of kidney cancer identifies 63 susceptibility regions

  A multi-ancestry genome-wide association meta-analysis of kidney cancer identifies 63 regions associated with disease susceptibility including one locus that was associated with increased risk in individuals with African ancestry.

  - Mark P. Purdue
  - Diptavo Dutta
  - Stephen J. Chanock

  Article26 Apr 2024
- ### Author Correction: Cell-type-specific and disease-associated expression quantitative trait loci in the human lung

  - Heini M. Natri
  - Christina B. Del Azodi
  - Nicholas E. Banovich

  Author CorrectionOpen Access25 Apr 2024
- ### Joint genotypic and phenotypic outcome modeling improves base editing variant effect quantification

  BEAN is a Bayesian approach for analyzing base editing screens with improved effect size quantification and variant classification. Applied to low-density lipoprotein (LDL)-associated common variants and saturation base editing of *LDLR*, BEAN identifies new LDL uptake genes and offers insights into variant structure–pathogenicity mechanisms.

  - Jayoung Ryu
  - Sam Barkal
  - Luca Pinello

  Article24 Apr 2024
- ### Genomic variation in weedy and cultivated broomcorn millet accessions uncovers the genetic architecture of agronomic traits

  A comprehensive variation map constructed by deep sequencing 1,904 accessions of weedy and cultivated broomcorn millet sheds light on the genetic architecture of agronomic traits during domestication.

  - Qiong Lu
  - Hainan Zhao
  - Weibin Song

  Article24 Apr 2024
- ### New genes helped acorn barnacles adapt to a sessile lifestyle

  A new acorn barnacles genome assembly, together with transcriptomic and proteomic datasets and functional experiments, identify *bcs-6* and *bsf*, as new genes involved in the settlement process by facilitating energy metabolism and stabilizing the alternating layers of chitin and calcites, respectively.

  - Zhaofang Han
  - Zhixuan Wang
  - Danqing Feng

  Article23 Apr 2024
- ### Finding the lost sister: mirror-image mutation phasing in mammalian mitotic sister cells

  This study establishes in vitro and in vivo systems to study mutagenesis and cancer genome evolution. Using microfluidics and mouse models, the method enables the dissection of co-occurring mutational processes and reveals that acute damage results in mirror-image mutation phasing between sister cells after a single mitosis.

  Research Briefing22 Apr 2024
- ### Differential selection of yield and quality traits has shaped genomic signatures of cowpea domestication and improvement

  High-quality genome assemblies of grain and vegetable cowpeas and re-sequencing of 344 accessions characterize genomic variations between cowpea subspecies and their domestication and improvement under selection.

  - Xinyi Wu
  - Zhongyuan Hu
  - Guojing Li

  Article22 Apr 2024
- ### Author Correction: New genetic signals for lung function highlight pathways and chronic obstructive pulmonary disease associations across multiple ancestries

  - Nick Shrine
  - Anna L. Guyatt
  - Louise V. Wain

  Author Correction19 Apr 2024
- ### Analysis of blood methylation quantitative trait loci in East Asians reveals ancestry-specific impacts on complex traits

  DNA methylation data of whole blood from Han Chinese individuals are used to map mQTLs, finding that *cis*- and *trans*-mQTLs show distinct patterns of East Asians (EA) ancestry-specific colocalization with complex trait variation.

  - Qianqian Peng
  - Xinxuan Liu
  - Sijia Wang

  Article19 Apr 2024
- ### Constants and variations in 69 diverse genomes of *Arabidopsis thaliana*

  Chromosome-level genome sequences of 69 diverse *Arabidopsis thaliana* strains reveal a quasi-fixed genome structure worldwide, in which large rearrangement is limited almost exclusively to the centromeric regions. Pan-genome analysis uncovered substantial diversity in gene content that, together with the genome assemblies, will fuel future genetic research.

  Research Briefing18 Apr 2024
- ### Genome-wide association analyses identify 95 risk loci and provide insights into the neurobiology of post-traumatic stress disorder

  Multi-ancestry genome-wide analyses identify 95 loci associated with post-traumatic stress disorder and implicate candidate genes, pathways and neurobiological systems underlying its pathophysiology.

  - Caroline M. Nievergelt
  - Adam X. Maihofer
  - Karestan C. Koenen

  Article18 Apr 2024
- ### Genetic modifiers of rare variants in monogenic developmental disorder loci

  Analysis of genetic modifiers of 599 developmental disorder genes in the UK Biobank found that rare variant burden within this set, as well as the common polygenic background, can alter the expressivity of cognitive and socioeconomic traits in an additive manner.

  - Rebecca Kingdom
  - Robin N. Beaumont
  - Caroline F. Wright

  ArticleOpen Access18 Apr 2024
- ### Integrative common and rare variant analyses provide insights into the genetic architecture of liver cirrhosis

  A multi-ancestry genome-wide association study of liver cirrhosis and its associated endophenotypes identifies and validates 14 risk variants. Integrative common and rare variant analyses provide insights into the genetic architecture of liver cirrhosis.

  - Jonas Ghouse
  - Gardar Sveinbjörnsson
  - Stefan Stender

  ArticleOpen Access17 Apr 2024
- ### Single-mitosis dissection of acute and chronic DNA mutagenesis and repair

  A single-cell-based approach allows the daughters of a damaged cell to be separately tracked following single mitotic events. This technique highlights the different ways in which ultraviolet light and reactive oxygen species cause mutagenesis.

  - Paul Adrian Ginno
  - Helena Borgers
  - Duncan T. Odom

  ArticleOpen Access16 Apr 2024
- ### A spatiotemporal atlas of cholestatic injury and repair in mice

  A comprehensive time series characterization of a mouse model of cholestatic liver injury with spatial enhanced resolution omics sequencing and single-cell RNA sequencing identifies zonal responses to insult, such as cholangiocyte signaling recruiting lipid-associated macrophages.

  - Baihua Wu
  - Xinyi Shentu
  - Lijian Hui

  Article16 Apr 2024
- ### A spatiotemporal atlas of mouse liver homeostasis and regeneration

  A Stereo-seq and scRNA-seq atlas of mouse liver in homeostasis and regeneration after partial hepatectomy identifies zonated genes, pathways, cell–cell interactions and gene regulatory networks. Functional validation finds that cooperation between TBL1XR1 and β-catenin activates hepatocyte proliferation.

  - Jiangshan Xu
  - Pengcheng Guo
  - Miguel A. Esteban

  Article16 Apr 2024
- ### Genetic associations of human metabolic traits

  - Wei Li

  Research Highlight15 Apr 2024
- ### Quantitative proteomics of protein–nucleosome interactions

  - Michael Fletcher

  Research Highlight15 Apr 2024
- ### Role of gene–gene loops in fine-tuning cross-regulation

  - Petra Gross

  Research Highlight15 Apr 2024
- ### Implementing polygenic risk scores in the clinic

  - Kyle Vogan

  Research Highlight15 Apr 2024

- Previous page
- page 1
- page 2
- page 3
- …
- page 535
- Next page

## Explore content

- Research articles
- Reviews & Analysis
- News & Comment
- Current issue
- Collections

- Follow us on Facebook
- Follow us on Twitter
- Sign up for alerts
- RSS feed


## About the journal

- Aims & Scope
- Journal Information
- Journal Metrics
- Our publishing models
- Editorial Values Statement
- Editorial Policies
- Content Types
- About the Editors
- Web Feeds
- Posters
- Contact
- Research Cross-Journal Editorial Team
- Reviews Cross-Journal Editorial Team


## Publish with us

- Submission Guidelines
- For Reviewers
- Language editing services
- Submit manuscript

## Search

Search articles by subject, keyword or author

Show results from

All journals
This journal

Search

Advanced search

### Quick links

- Explore articles by subject
- Find a job
- Guide to authors
- Editorial policies

Nature Genetics (*Nat Genet*)

ISSN 1546-1718 (online)

ISSN 1061-4036 (print)

## nature.com sitemap

### About Nature Portfolio

- About us
- Press releases
- Press office
- Contact us

### Discover content

- Journals A-Z
- Articles by subject
- protocols.io
- Nature Index

### Publishing policies

- Nature portfolio policies
- Open access

### Author & Researcher services

- Reprints & permissions
- Research data
- Language editing
- Scientific editing
- Nature Masterclasses
- Research Solutions

### Libraries & institutions

- Librarian service & tools
- Librarian portal
- Open research
- Recommend to library

### Advertising & partnerships

- Advertising
- Partnerships & Services
- Media kits
- Branded
  content

### Professional development

- Nature Careers
- Nature 
  Conferences

### Regional websites

- Nature Africa
- Nature China
- Nature India
- Nature Italy
- Nature Japan
- Nature Middle East

- Privacy
  Policy
- Use
  of cookies
- Your privacy choices/Manage cookies
- Legal
  notice
- Accessibility
  statement
- Terms & Conditions
- Your US state privacy rights

© 2024 Springer Nature Limited

xml version="1.0" encoding="UTF-8"?
